# Supplementary material for: An eco-friendly gelatin based triboelectric nanogenerator for a self-powered PANI nanorod/NiCo2O4 nanosphere ammonia gas sensor
Source: Royal Society of Chemistry journal article supplement (doi:10.1039/d2ta01788a), 2022-01-01
Supplement: d2ta01788a1.pdf [file d2ta01788a1.pdf]

## **Supporting Information**

### **Eco-Friendly Gelatin Based Triboelectric Nanogenerator for Self-Powered PANI Nanorods/NiCo<sub>2</sub>O<sub>4</sub> Nanospheres Ammonia Gas Sensor**

**Dongzhi Zhang\*, Yan Yang, Zhenyuan Xu, Dongyue Wang, Chen Du**

College of Control Science and Engineering, China University of Petroleum (East  
China), Qingdao 266580, China

\*Corresponding author: Dongzhi Zhang

E-mail address: dzzhang@upc.edu.cn

Tel: +86-532-86982928

Fax: +86-532-86981335

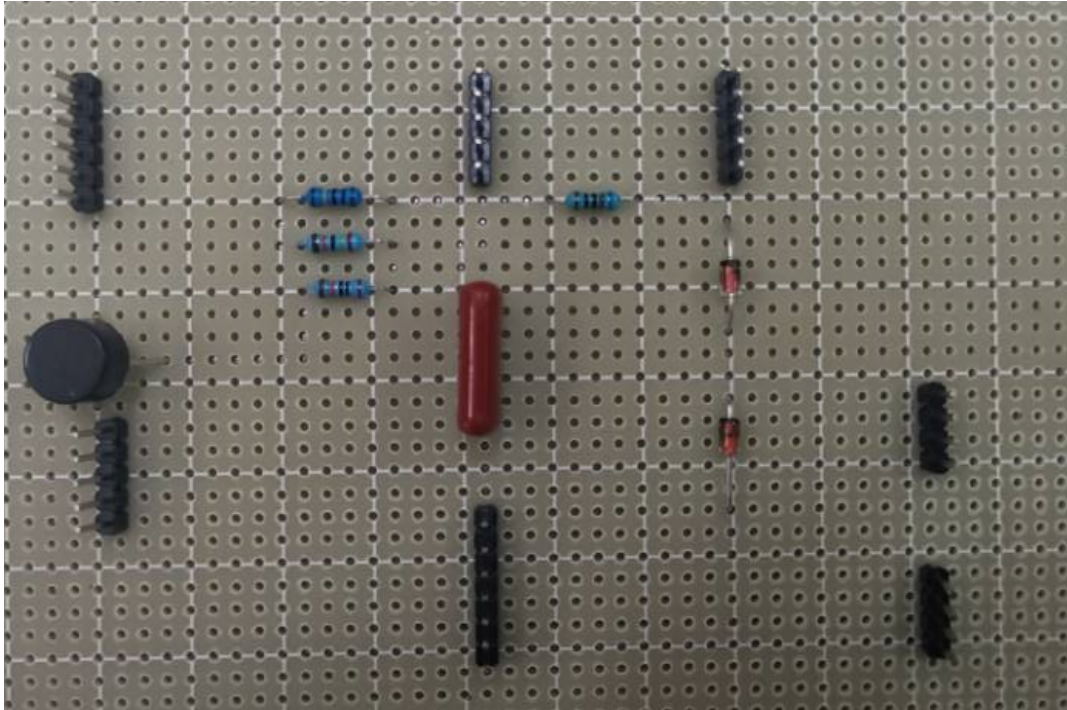

**Figure S1.** The physical image of the rectification and voltage regulation circuit module.

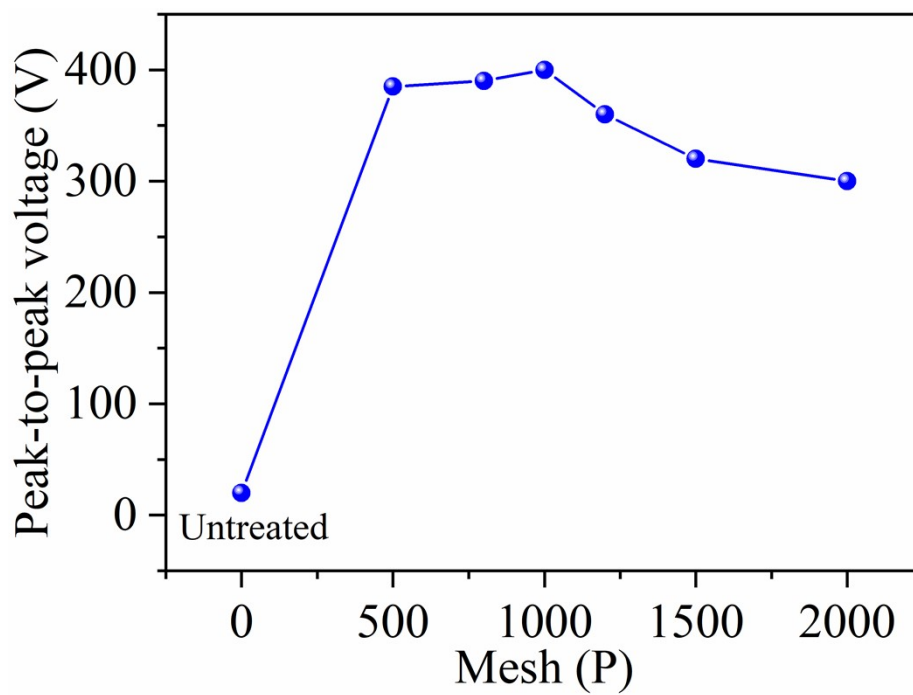

**Figure S2.** Output performance of the GP-TENG based on gelatin films prepared with abrasive papers of different meshes as templates.

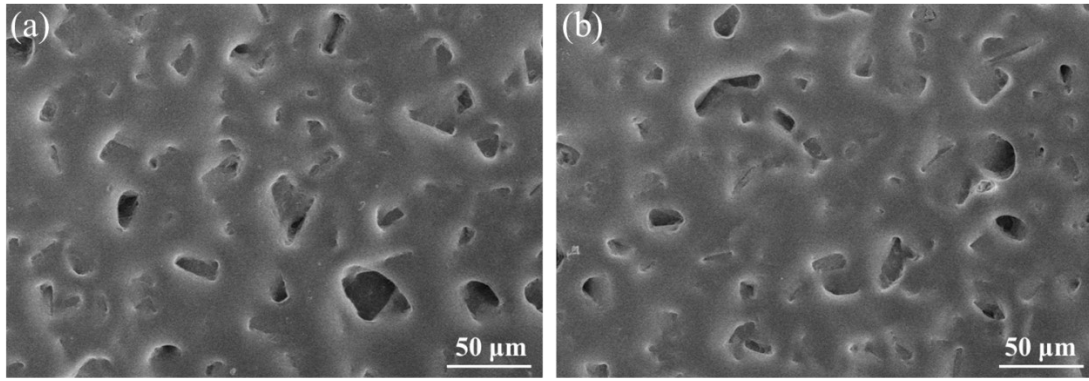

**Figure S3.** (a-b) SEM images of the nanostructured gelatin film prepared with P1000 abrasive paper.

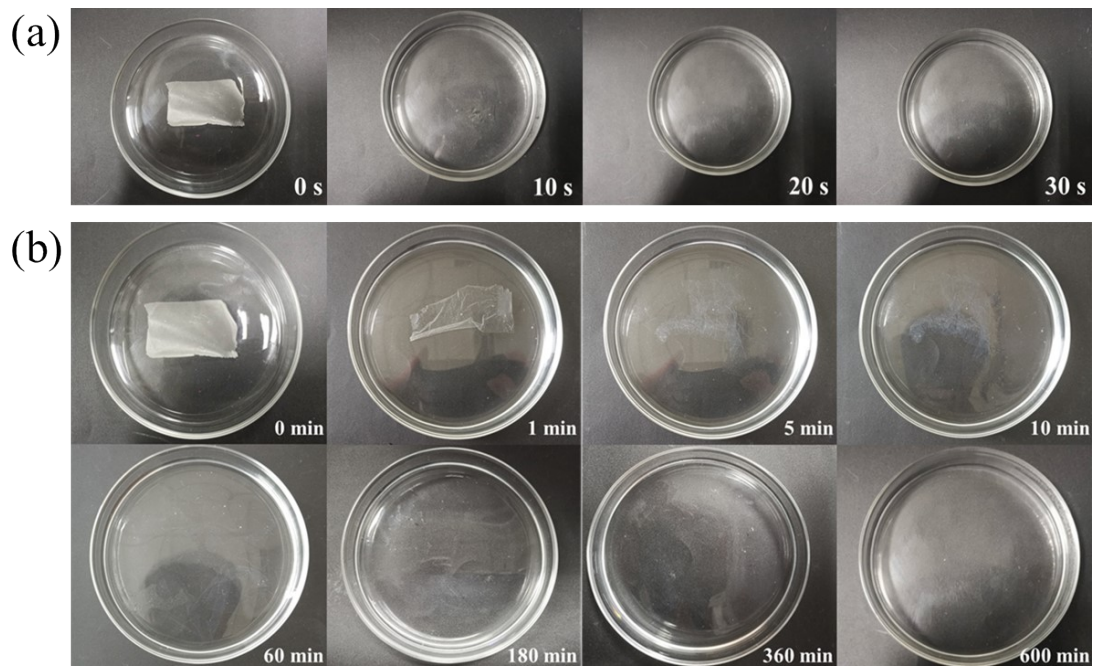

**Figure S4.** The degradation process of gelatin films in (a) hot water and (b) cold water.

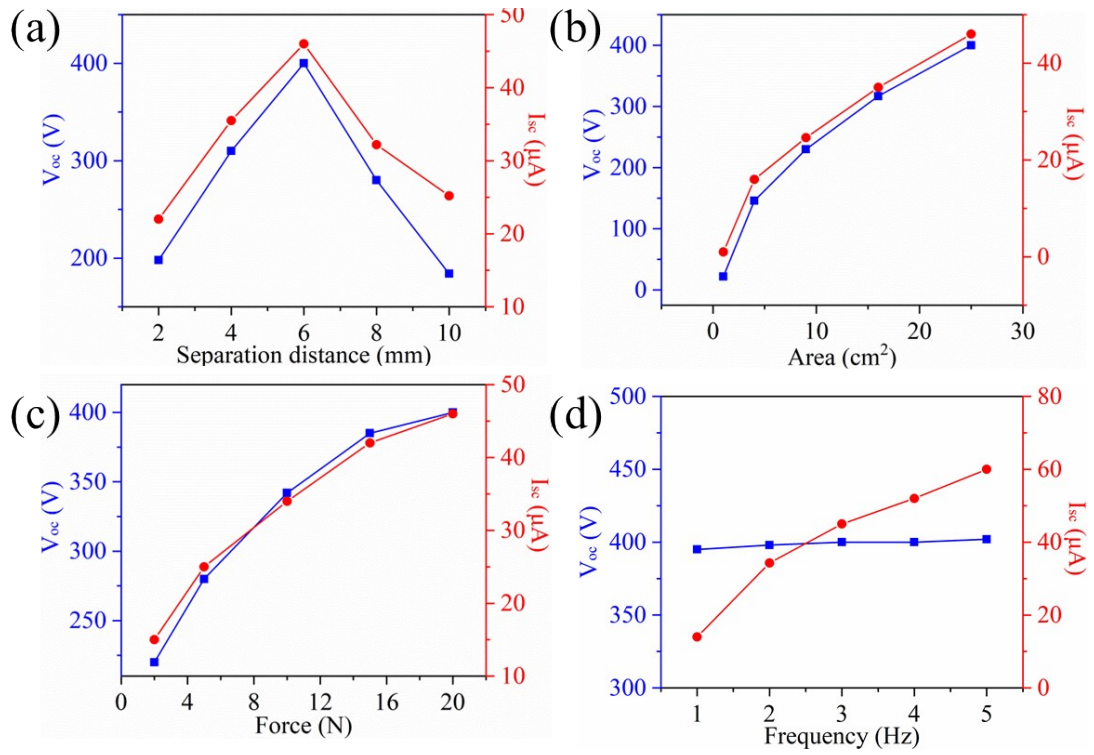

**Figure S5.** Performance optimization of the GP-TENG by varying: (a) initial separation distance, (b) device area, (c) force, and (d) vibration frequency.

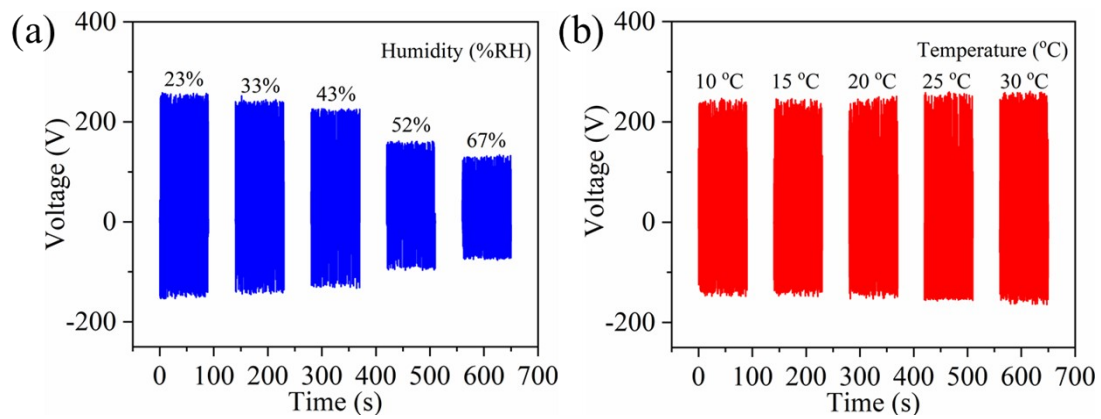

**Figure S6.** (a) The cycling stability of the GP-TENG at different relative humidity and 25°C. (b) The cycling stability of the GP-TENG at different temperatures and 23% RH.

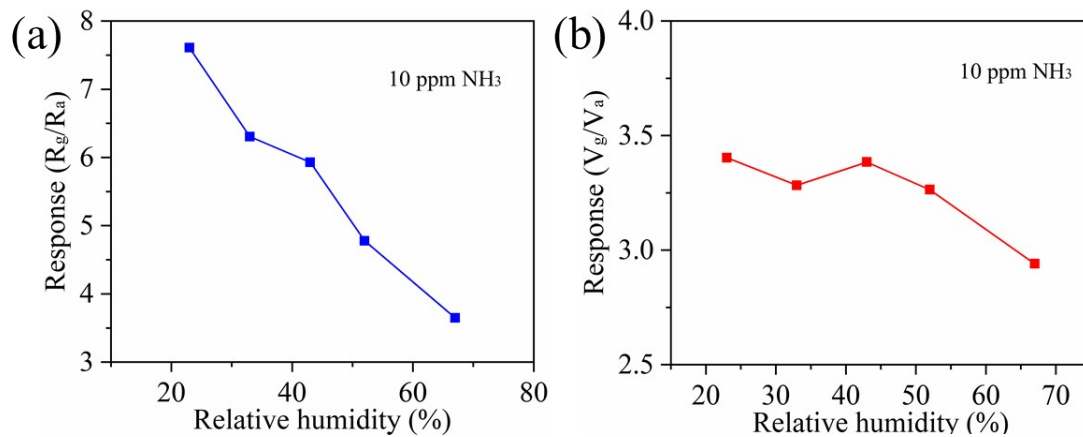

**Figure S7.** (a) The response ( $R_g/R_a$ ) of the PANI/NiCo<sub>2</sub>O<sub>4</sub> gas sensor towards 10 ppm NH<sub>3</sub> under different humidity environments (23-67% RH). (b) The response ( $V_g/V_a$ ) of the GPAS under different humidity environments (23-67% RH).



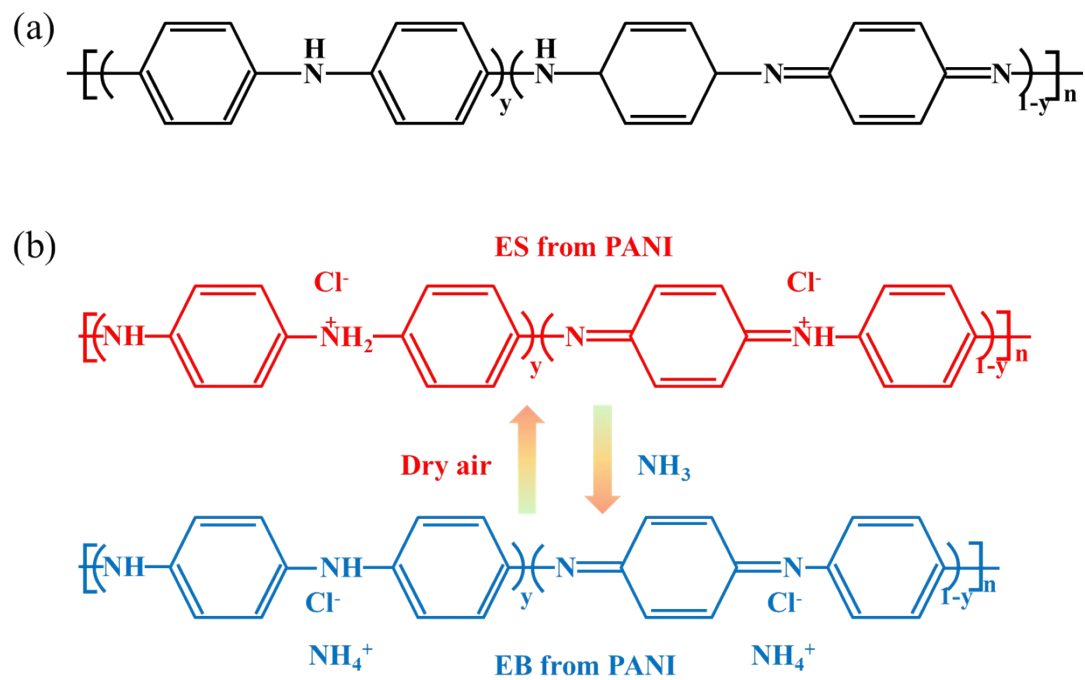

**Figure S8.** (a) Molecular structure model of eigenstate polyaniline. (b) The reaction mechanism model of HCl doped ES form PANI with  $\text{NH}_3$  molecules to EB form PANI.
